# Supplementary material for: Community health workers and Covid-19: Cross-country evidence on their roles, experiences, challenges and adaptive strategies
Source: PubMed Central journal article supplement (PMC10022071; doi:10.1371/journal.pgph.0001447), 2023-01-04
Supplement: pgph.0001447.s001.pdf [file pgph.0001447.s001.pdf]

**S1 Table. Reports included in the synthesis**

| Project                                                                                                                                  | Funder and client                                                  | Title                                                                                                                                                         | Country    | Month/Year | Focus                                                                                                                                                                                                                              | Methods                                                                                                                                                                                                                                                                                                     | Authors                                              | Key organisational partners (for reports where other organisations beyond OPM were involved in co-producing the research) | Ethical approval                                                                                                                                                              |
|------------------------------------------------------------------------------------------------------------------------------------------|--------------------------------------------------------------------|---------------------------------------------------------------------------------------------------------------------------------------------------------------|------------|------------|------------------------------------------------------------------------------------------------------------------------------------------------------------------------------------------------------------------------------------|-------------------------------------------------------------------------------------------------------------------------------------------------------------------------------------------------------------------------------------------------------------------------------------------------------------|------------------------------------------------------|---------------------------------------------------------------------------------------------------------------------------|-------------------------------------------------------------------------------------------------------------------------------------------------------------------------------|
| Assessing the Indirect Effects of COVID-19 on Essential Health and Nutrition Services in selected rural and urban settings of Bangladesh | Funded by the Global Financing Facility, managed by the World Bank | Assessing the indirect effects of COVID-19 on Essential Health and Nutrition Services in selected rural and urban settings of Bangladesh: A qualitative study | Bangladesh | May 2021   | Qualitative assessment of the indirect effects of COVID-19 on Essential Health and Nutrition Services (EHNS) in selected rural and urban settings with specific focus on RMNCAH provision, coverage, utilisation and care-seeking. | Document review; 68 in-depth interviews with health service providers (including HA, FWA, FWV, other health workers, and managers, in the government, private, NGO and informal sectors); 4 in-depth interviews with community leaders; focus group discussions with CHW (HAs (1), FWAs (1), FWVs (1), BRAC | Muhammod Abdus Sabur, Nazme Sabina, and Adiba Khaled | Development Research Initiatives (dRi)                                                                                    | Approval from the Institutional Review Board of the Institute of Health Economics, University of Dhaka, which is approved by Federal Wide Assurance (FWA), [No. FWA00026031]. |

| Project                                                 | Funder and client                                 | Title                                                                                                                                                                 | Country                                           | Month/Year | Focus                                                                                                                                                                                                           | Methods                                                                                                                                                                                     | Authors                                                              | Key organisational partners (for reports where other organisations beyond OPM were involved in co-producing the research) | Ethical approval                                                                                                                                                                                                                                                            |
|---------------------------------------------------------|---------------------------------------------------|-----------------------------------------------------------------------------------------------------------------------------------------------------------------------|---------------------------------------------------|------------|-----------------------------------------------------------------------------------------------------------------------------------------------------------------------------------------------------------------|---------------------------------------------------------------------------------------------------------------------------------------------------------------------------------------------|----------------------------------------------------------------------|---------------------------------------------------------------------------------------------------------------------------|-----------------------------------------------------------------------------------------------------------------------------------------------------------------------------------------------------------------------------------------------------------------------------|
|                                                         |                                                   |                                                                                                                                                                       |                                                   |            |                                                                                                                                                                                                                 | shebikas (2) (DOTS providers), and community members and patients (34); 25 key informant interviews with national government, development agencies, and other key stakeholders and experts. |                                                                      |                                                                                                                           |                                                                                                                                                                                                                                                                             |
| Maintaining essential services after a natural disaster | Foreign, Commonwealth & Development Office (FCDO) | COVID-19 Rapid country studies: country reports for Bangladesh, Kenya, and Sierra Leone, cross-country synthesis report covering these countries, Pakistan and Uganda | Bangladesh, Kenya, Pakistan, Sierra Leone, Uganda | July 2020  | Rapid situation analyses on the initial response to COVID-19 in the first few months of the outbreak, considering different health system pillars, wider governance structures, and response in related sectors | Document review, cross-country total of 52 key informant interviews with policy makers and other stakeholders; community survey in Sierra Leone                                             | Debbie Hillier, Tom Newton-Lewis, Rithika Nair, and Christoph Larsen |                                                                                                                           | The rapid COVID-19 assessments were short, initial assessments conducted to inform immediate programming decisions. The methods were restricted to document review and discussions with senior officials on health system issues, within their official professional roles, |

| Project | Funder and client | Title                                                                                            | Country    | Month/Year | Focus                                                                                                                                                                            | Methods                                                                                                                                                                              | Authors                                                                                                      | Key organisational partners (for reports where other organisations beyond OPM were involved in co-producing the research) | Ethical approval                                                                                                                                                                      |
|---------|-------------------|--------------------------------------------------------------------------------------------------|------------|------------|----------------------------------------------------------------------------------------------------------------------------------------------------------------------------------|--------------------------------------------------------------------------------------------------------------------------------------------------------------------------------------|--------------------------------------------------------------------------------------------------------------|---------------------------------------------------------------------------------------------------------------------------|---------------------------------------------------------------------------------------------------------------------------------------------------------------------------------------|
|         |                   |                                                                                                  |            |            | such as social protection                                                                                                                                                        |                                                                                                                                                                                      |                                                                                                              |                                                                                                                           | which did not cover sensitive or personal information. Given this purpose and methods, ethics review was not required.                                                                |
|         |                   | COVID-19 Response: Rapid country study Bangladesh                                                | Bangladesh | April 2020 | Rapid assessment on leadership and governance of the response to COVID-19 and impact of COVID-19 across social sectors, with a primary focus on health                           | Document review, and 5 key stakeholder interviews                                                                                                                                    | Shah Monir Hossain and Rumana Huque                                                                          |                                                                                                                           | As above for the Maintains COVID-19 Rapid country studies                                                                                                                             |
|         |                   | Response & Preparedness for Essential Health and Nutrition Services During Disasters In Pakistan | Pakistan   | June 2021  | Health system preparedness and response to shocks (floods droughts COVID-19), considering different health system pillars at national and province level, and community response | Document review; review of HMIS data; key informant interviews with government and other stakeholders involved in health sector response to shocks at national (14), provincial (81) | Zafar Fatmi, Rabia Najmi, Nousheen Akber Pradhan, Zarak Ahmed, Minhaj Qidwai, Sana Hyat, and Sania Khursheed | Department of Community Health Sciences Aga Khan University, Karachi (Pakistan)                                           | Approval from the Ethical Review Committee of the Aga Khan University [2020-1936-10170] and ethical clearance from the National Bioethics Committee. [Ref: No.4-87/COVID-29/ NBC/21/] |

| Project | Funder and client | Title                             | Country      | Month/Year | Focus                                                                                                                                                  | Methods                                                                                                                                                                                                     | Authors                                          | Key organisational partners (for reports where other organisations beyond OPM were involved in co-producing the research) | Ethical approval                                          |
|---------|-------------------|-----------------------------------|--------------|------------|--------------------------------------------------------------------------------------------------------------------------------------------------------|-------------------------------------------------------------------------------------------------------------------------------------------------------------------------------------------------------------|--------------------------------------------------|---------------------------------------------------------------------------------------------------------------------------|-----------------------------------------------------------|
|         |                   |                                   |              |            |                                                                                                                                                        | district (63) and village or union (48) levels; structured interviews with 63 healthcare providers; focus group discussions with Lady Health Workers (LHWs) (16) and male and female community members (38) |                                                  |                                                                                                                           |                                                           |
|         |                   | Rapid Country Study: Sierra Leone | Sierra Leone | May 2020   | Rapid assessment on leadership and governance of the response to COVID-19 and impact of COVID-19 across social sectors, with a primary focus on health | Document review; 12 key informant interviews with national government, donors, NGOs and youth leaders; observation of EOC meetings.                                                                         | Kevin Grieco, Yasmina Yusuf, and Niccoló Meriggi | Individual consultants                                                                                                    | As above for the Maintains COVID-19 Rapid country studies |

| Project | Funder and client | Title                                                                                                                       | Country      | Month/Year     | Focus                                                                                                                                                                         | Methods                                                                                                                                                                                                              | Authors                                                                                       | Key organisational partners (for reports where other organisations beyond OPM were involved in co-producing the research)                | Ethical approval                                                                                |
|---------|-------------------|-----------------------------------------------------------------------------------------------------------------------------|--------------|----------------|-------------------------------------------------------------------------------------------------------------------------------------------------------------------------------|----------------------------------------------------------------------------------------------------------------------------------------------------------------------------------------------------------------------|-----------------------------------------------------------------------------------------------|------------------------------------------------------------------------------------------------------------------------------------------|-------------------------------------------------------------------------------------------------|
|         |                   | The effectiveness of the Sierra Leone health sector response to health shocks: Evidence from the COVID-19 perception survey | Sierra Leone | May 2021       | The health sector response to COVID-19, particularly related to service delivery, leadership and governance, the health workforce, and community ownership and participation. | Survey of 303 stakeholders engaged with the COVID-19 response, including Ministry of Health and Sanitation employees at national, district and facility levels, and staff from other government or partner agencies. | Philip S. Amara, Fredline A M'Cormack-Hale, Mohamed Kanu, Regina Bash-Taqi, and Alhassan Kanu | Institute for Development, International Growth Centre, Dalan Development Consultants and College of Medicine and Allied Health Sciences | Approved by the Sierra Leone Ethics and Scientific Review Committee (no reference numbers used) |
|         |                   | Beyond the state: The role of traditional leaders in COVID-19                                                               | Sierra Leone | September 2020 | Role of traditional leaders in supporting the COVID-19 response at community level, including extent of and gaps in government coordination                                   | Key informant interviews with 15 district-level government actors, traditional leaders, and health professionals                                                                                                     | Kevin Grieco                                                                                  | International Growth Centre, Dalan Development Consultants and College of Medicine and Allied Health Sciences                            | Approved by the Sierra Leone Ethics and Scientific Review Committee (no reference numbers used) |

| Project                                                | Funder and client                        | Title                                                             | Country | Month/Year              | Focus                                                                                                                                                                                                                                   | Methods                                                                                                                                             | Authors                                           | Key organisational partners (for reports where other organisations beyond OPM were involved in co-producing the research) | Ethical approval                                                                 |
|--------------------------------------------------------|------------------------------------------|-------------------------------------------------------------------|---------|-------------------------|-----------------------------------------------------------------------------------------------------------------------------------------------------------------------------------------------------------------------------------------|-----------------------------------------------------------------------------------------------------------------------------------------------------|---------------------------------------------------|---------------------------------------------------------------------------------------------------------------------------|----------------------------------------------------------------------------------|
|                                                        |                                          | COVID-19 Response: Rapid country study Kenya                      | Kenya   | May 2020                | To learn from COVID-19 around the national ability to respond to shocks. by focusing on the leadership and governance of the response to the pandemic, and its impact across social sectors, with a primary focus on the health sector. | Documents review; 6 remote interviews with key stakeholders.                                                                                        | Akaco Ekirapa                                     |                                                                                                                           | As above for the Maintains COVID-19 Rapid country studies                        |
| The Bihar Technical Support Programme - learning grant | Bill and Melinda Gates Foundation (BMGF) | Bihar COVID-19: Experiences of Community Women (multiple reports) | India   | June 2020-December 2020 | Gender-based impacts of COVID-19 on the health, social lives, livelihoods and other aspects of women's lives during COVID-19                                                                                                            | Series of telephone interviews (5 rounds) with female self-help group leaders, members and community mobilisers, ranging from 8-12 women per round. | Priya Das, Rochana Kammowanee, and Maheen Shakeel |                                                                                                                           | Approved by the Sigma Institutional Review Board: [IRB Number: 10011/IRB/20-21]. |

| Project | Funder and client                        | Title                                                                                           | Country | Month/Year            | Focus                                                                                                                                                                                     | Methods                                                                                                                                 | Authors                                                                                  | Key organisational partners (for reports where other organisations beyond OPM were involved in co-producing the research) | Ethical approval                                                                |
|---------|------------------------------------------|-------------------------------------------------------------------------------------------------|---------|-----------------------|-------------------------------------------------------------------------------------------------------------------------------------------------------------------------------------------|-----------------------------------------------------------------------------------------------------------------------------------------|------------------------------------------------------------------------------------------|---------------------------------------------------------------------------------------------------------------------------|---------------------------------------------------------------------------------|
|         |                                          | Bihar COVID-19 Situation: PHC Preparedness and Impact on Services (multiple reports).           | India   | April 2020 – May 2020 | Barriers and facilitators to the primary care response to COVID-19, the ability of rural health to provide routine essential services, and the vulnerabilities faced by health providers. | Document review; series of informal telephone conversations with Community Health Centre managers and frontline workers, including ANMs | Priya Das, Karima Khalil, and Priyanjali Mitra                                           |                                                                                                                           | Approved by the Sigma Institutional Review Board [IRB Number: 10026/IRB/19-20]  |
|         | Bill and Melinda Gates Foundation (BMGF) | Understanding the Community Health System: Experiences of Elected Women Representatives (EWRs). | India   | December 2020         | The role of local government Elected Women Representatives (ERWs) in the community health system, including their links with CHW, including their role during COVID-19                    | Telephone interviews with 20 EWRs                                                                                                       | Vinaya Padmanabhan, Shuchi Srinivasan, Bibha Mishra. and Rajiv Bhardwaj, Bhagwati Pandey | Centre for Catalysing Change (C3)                                                                                         | Approved by the Sigma Institutional Review Board [IRB Number: 10027/IRB/20-21]. |

| Project                                                                                                       | Funder and client | Title                                                                                                                 | Country | Month/Year    | Focus                                                                                                                                                                                                              | Methods                                                                                                                                                                                                                | Authors                                                                                                                                                                                                            | Key organisational partners (for reports where other organisations beyond OPM were involved in co-producing the research)                                                                 | Ethical approval                                                                |
|---------------------------------------------------------------------------------------------------------------|-------------------|-----------------------------------------------------------------------------------------------------------------------|---------|---------------|--------------------------------------------------------------------------------------------------------------------------------------------------------------------------------------------------------------------|------------------------------------------------------------------------------------------------------------------------------------------------------------------------------------------------------------------------|--------------------------------------------------------------------------------------------------------------------------------------------------------------------------------------------------------------------|-------------------------------------------------------------------------------------------------------------------------------------------------------------------------------------------|---------------------------------------------------------------------------------|
|                                                                                                               |                   | Making community health worker supervision more supportive: insights from an implementation research pilot.           | India   | November 2021 | The impact of training in supportive supervision alongside support for coaching and mentoring on the perceptions and performance of CHWs and their supervisors.                                                    | Telephonic interviews with 3 BCMs, 6 AFs and 12 ASHAs; in-person quantitative survey with 708 ASHAs and 34 Afs.                                                                                                        | Shuchi Srinivasan, Arpana Kullu, Bhagwati Pandey, Adiba Khaled, Agrima Sahore, and Cindy Carlson                                                                                                                   |                                                                                                                                                                                           | Approved by the Sigma Institutional Review Board [IRB Number: 10012/IRB/21-22]. |
| Assessment of Institutional Arrangements and Human Resources of the National Tuberculosis Elimination Program | World Bank        | Assessment of Institutional Arrangements and Human Resources of the National Tuberculosis Elimination Program (NTEP). | India   | February 2021 | Institutional support mechanisms to implement the NTEP at national, state and district levels, with a focus on structures and gaps related to human resources, and including the impact of COVID-19 on TB services | Document review; quantitative telephone survey of 377 health managers and providers involved in core TB or general health service delivery, from state to primary level (including ASHA), to assess workload using the | <p><b>OPM</b><br/>Vimal Kumar, Agrima Sahore, Soumyajit Ray, Adiba Khalid</p> <p><b>OPM External</b><br/>Shankar Dapkerkar, Shveta Kalyanwala</p> <p><b>KIT</b><br/>Marjolien Dielemen, Christina Mergenthaler</p> | Ministry of Health and Family Welfare (MOHFW)-Gol, and National Health Systems Resource Centre (NHSRC), Royal Tropical Institute (KIT), National Tuberculosis Elimination Program (NTEP). | Approved by the Sigma Institutional Review Board [IRB Number: 10032/IRB/20-21]  |



| Project                                                | Funder and client                                                                                       | Title                                                                                        | Country  | Month/Year   | Focus                                                                                                                       | Methods                                                                                                                                                                                                                                                              | Authors                                                                | Key organisational partners (for reports where other organisations beyond OPM were involved in co-producing the research) | Ethical approval                                                                                                                                                                                                |
|--------------------------------------------------------|---------------------------------------------------------------------------------------------------------|----------------------------------------------------------------------------------------------|----------|--------------|-----------------------------------------------------------------------------------------------------------------------------|----------------------------------------------------------------------------------------------------------------------------------------------------------------------------------------------------------------------------------------------------------------------|------------------------------------------------------------------------|---------------------------------------------------------------------------------------------------------------------------|-----------------------------------------------------------------------------------------------------------------------------------------------------------------------------------------------------------------|
|                                                        |                                                                                                         |                                                                                              |          |              |                                                                                                                             | WHO Indicator of Staffing Need; 60 qualitative telephone interviews with health managers and providers from state to block level, on experiences and challenges in TB service provision and staffing, and additional discussions with national government and donors |                                                                        |                                                                                                                           |                                                                                                                                                                                                                 |
| Building Resilience in Ethiopia – Technical Assistance | Foreign, Commonwealth & Development Office (FCDO) and U.S. Agency for International Development (USAID) | Intra-Action Review (IAR) on Public Health Preparedness and Response to Covid-19 in Ethiopia | Ethiopia | October 2020 | Effective practice and challenges in the COVID-19 response, to guide future action for the response and future preparedness | Document review; key informant interviews, focus group discussions and workshops with government staff involved                                                                                                                                                      | Ministry of Health – Ethiopia<br><br>Ethiopian Public Health Institute | Ethiopia Ministry of Health, Ethiopian Public Health Institute, Regional Health Bureaus                                   | Intra-Action Reviews are led by government and conducted as per WHO's Guidance for Conducting a Country COVID-19 Intra-Action Review. They involve discussion among key COVID-19 responders and decision makers |

| Project | Funder and client                                                                                       | Title                                                                                                | Country  | Month/Year | Focus                                                                                                                       | Methods                                                                                                                                                                                                                                            | Authors                                                                                                  | Key organisational partners (for reports where other organisations beyond OPM were involved in co-producing the research) | Ethical approval                                                                                                                                                   |
|---------|---------------------------------------------------------------------------------------------------------|------------------------------------------------------------------------------------------------------|----------|------------|-----------------------------------------------------------------------------------------------------------------------------|----------------------------------------------------------------------------------------------------------------------------------------------------------------------------------------------------------------------------------------------------|----------------------------------------------------------------------------------------------------------|---------------------------------------------------------------------------------------------------------------------------|--------------------------------------------------------------------------------------------------------------------------------------------------------------------|
|         |                                                                                                         |                                                                                                      |          |            |                                                                                                                             | in the response at national, regional, and facility level                                                                                                                                                                                          |                                                                                                          |                                                                                                                           | within government, and focus on systems improvements rather than any sensitive or personal issues. Hence, ethics approval is not recommended or required for IARs. |
|         | Foreign, Commonwealth & Development Office (FCDO) and U.S. Agency for International Development (USAID) | Intra-Action Review (IAR) on Public Health Preparedness and Response to Covid-19 in Sidama, Ethiopia | Ethiopia | March 2021 | Effective practice and challenges in the COVID-19 response, to guide future action for the response and future preparedness | Document review; key informant interviews with government staff involved in the response at regional, or quarantine facility levels; small group workshops involving over 32 experts) from the regional public health emergency operations centre. | Sidama Regional Health Bureau,<br>Ministry of Health – Ethiopia<br><br>Ethiopian Public Health Institute | Sidama Regional Health Bureau,<br>Ministry of Health,<br>Ethiopian Public Health Institute                                | As above for national IAR                                                                                                                                          |

| Project                                                                 | Funder and client                                                                                       | Title                                                                                                                                       | Country  | Month/Year  | Focus                                                                                                                           | Methods                                                                                                                                                                                                                                           | Authors                                                                                                                      | Key organisational partners (for reports where other organisations beyond OPM were involved in co-producing the research) | Ethical approval                                                                                                                                          |
|-------------------------------------------------------------------------|---------------------------------------------------------------------------------------------------------|---------------------------------------------------------------------------------------------------------------------------------------------|----------|-------------|---------------------------------------------------------------------------------------------------------------------------------|---------------------------------------------------------------------------------------------------------------------------------------------------------------------------------------------------------------------------------------------------|------------------------------------------------------------------------------------------------------------------------------|---------------------------------------------------------------------------------------------------------------------------|-----------------------------------------------------------------------------------------------------------------------------------------------------------|
|                                                                         | Foreign, Commonwealth & Development Office (FCDO) and U.S. Agency for International Development (USAID) | Intra-Action Review (IAR) on Public Health Preparedness and Response to Covid-19 in Ethiopia. Gambella Region.                              | Ethiopia | March 2021  | Effective practice and challenges in the COVID-19 response, to guide future action for the response and future preparedness     | Document review; key informant interviews with public health emergency operations centre staff; focus group discussions involving 66 stakeholders, including staff from the regional public health emergency operations centre and other partners | Gambella Region Health Bureau, COVID-19 Public Health Emergency Operation Centre, WHO and Partners                           | Gambella regional Health Bureau, WHO                                                                                      | As above for national IAR                                                                                                                                 |
| Operational Research on Key Nutrition-Specific Intervention in Ethiopia | United Nations Children's Fund (UNICEF)                                                                 | Formative research on key nutrition specific interventions in Ethiopia. UNICEF Operational research on key nutrition specific interventions | Ethiopia | August 2021 | Implementation of three nutrition-specific interventions, including gap and challenges, and the effects of COVID-19 on delivery | 197 in-depth interviews with health professionals at regional, zonal, health centre and health post levels, including HEW, and community                                                                                                          | Daniel Wate, Sonya Rabeneck, Alula Meressa Teklu, Girmay Medhin, Sarone Makonnen, Gloria Olisenekwu and Madhav Vaidyanathan. | Monitoring Evaluation, Research and Quality improvement consultancy - MERQ PLC (Ethiopia)                                 | Approved by the Ethiopian Public Health Institute (EPHI) Institutional Review Board. [Protocol Number: EPHI-IRB-333-2020; EPHI reference number 6.13/285] |

| Project                             | Funder and client                       | Title                                                                                                                                                  | Country  | Month/Year    | Focus                                                                                                                                                 | Methods                                                                                                                                                                                       | Authors                                                   | Key organisational partners (for reports where other organisations beyond OPM were involved in co-producing the research) | Ethical approval                                                                                             |
|-------------------------------------|-----------------------------------------|--------------------------------------------------------------------------------------------------------------------------------------------------------|----------|---------------|-------------------------------------------------------------------------------------------------------------------------------------------------------|-----------------------------------------------------------------------------------------------------------------------------------------------------------------------------------------------|-----------------------------------------------------------|---------------------------------------------------------------------------------------------------------------------------|--------------------------------------------------------------------------------------------------------------|
|                                     |                                         |                                                                                                                                                        |          |               |                                                                                                                                                       | members; 28 focus group discussion with female community members; observation at 56 facilities                                                                                                |                                                           |                                                                                                                           |                                                                                                              |
| COVID-19 vaccine supply and rollout | United Nations Children's Fund (UNICEF) | Real time assessment (RTA) of UNICEF's ongoing response to COVID-19 in eastern and southern Africa: COVID-19 vaccine supply and rollout. November 2021 | Ethiopia | December 2021 | Assessment of UNICEF's support to COVID-19 vaccine rollout, including understanding progress and challenges in supply, distribution, and coordination | Document review; key informant interviews with 30 respondents, including staff from UNICEF, development partners and government at national and subnational levels, and regional UNICEF staff | Kate Gooding, Jayne Webster, Nicola Wiafe and Vimal Kumar |                                                                                                                           | Approved by the Human Subjects Research and Ethics Approval Independent Review Board [IRB 2021: 389GLOB29x]. |
