# Supplementary material for: Community health workers and Covid-19: Cross-country evidence on their roles, experiences, challenges and adaptive strategies
Source: PubMed Central journal article supplement (PMC10022071; doi:10.1371/journal.pgph.0001447), 2023-01-04
Supplement: pgph.0001447.s002.pdf [file pgph.0001447.s002.pdf]

**S2 Table. Thematic framework for synthesis**

| <b>Theme</b>                                                                                                        | <b>Sub-theme</b>                                                                                              |
|---------------------------------------------------------------------------------------------------------------------|---------------------------------------------------------------------------------------------------------------|
| <b>1 Document Information</b>                                                                                       | 1.1 Country                                                                                                   |
|                                                                                                                     | 1.2 Research Title                                                                                            |
|                                                                                                                     | 1.3 Research Objectives                                                                                       |
|                                                                                                                     | 1.4 Method                                                                                                    |
|                                                                                                                     | 1.5 Sample (numbers, types of stakeholders, locations including whether urban or rural)                       |
|                                                                                                                     | 1.6 Dates of fieldwork/data collection                                                                        |
|                                                                                                                     | 1.7 OTHER document details                                                                                    |
| <b>2 CHW cadre characteristics</b>                                                                                  | 2.1 CHW cadre                                                                                                 |
|                                                                                                                     | 2.2 Typical Years of training for each cadre                                                                  |
|                                                                                                                     | 2.3 Mode of engagement for each cadre                                                                         |
|                                                                                                                     | 2.4 Payment mode for each cadre                                                                               |
|                                                                                                                     | 2.5 OTHER type of Support provided to CHW beyond payment                                                      |
| <b>3 Routine services provided by these CHW cadres (pre-covid) – specify for each cadre discussed in the report</b> | 3.1 Preventive services                                                                                       |
|                                                                                                                     | 3.2 Provision of clinical services                                                                            |
|                                                                                                                     | 3.3 Community mobilization and education                                                                      |
| <b>4 Roles CHW played in the COVID-19 response, including vaccine delivery</b>                                      | 4.1 Identification of potential covid cases / screening people with potential COVID-19 symptoms               |
|                                                                                                                     | 4.2 Contact tracing                                                                                           |
|                                                                                                                     | 4.3 Follow-up of patients with COVID-19                                                                       |
|                                                                                                                     | 4.4 Epidemiographic surveillance and record-keeping                                                           |
|                                                                                                                     | 4.5 Delivery of Covid Vaccines                                                                                |
|                                                                                                                     | 4.6 Community education and awareness on COVID-19                                                             |
|                                                                                                                     | 4.7 OTHER Roles                                                                                               |
| <b>5 Support provided to CHW during COVID-19– including information on lack of this support</b>                     | 5.1 Training on providing services related to Covid-19                                                        |
|                                                                                                                     | 5.2 Training on providing routine services during COVID-19                                                    |
|                                                                                                                     | 5.3 Guidelines to support CHWs activities related to Covid-19 or delivery of routine services during COVID-19 |
|                                                                                                                     | 5.4 Additional human resource                                                                                 |

| Theme                                                                                                                                                                                                                    | Sub-theme                                                                                                                                                                                                                                                                                                                                                                                                                                                                                                                                                                                                                       |
|--------------------------------------------------------------------------------------------------------------------------------------------------------------------------------------------------------------------------|---------------------------------------------------------------------------------------------------------------------------------------------------------------------------------------------------------------------------------------------------------------------------------------------------------------------------------------------------------------------------------------------------------------------------------------------------------------------------------------------------------------------------------------------------------------------------------------------------------------------------------|
|                                                                                                                                                                                                                          | 5.5 Financial motivation / support for CHWs<br>5.6 Personal protective equipment (PPE)<br>5.7 Managerial support for CHW during COVID-19<br>5.8 Community support<br>5.9 Peer Support<br>5.10 Support for CHW mental health/ wellbeing<br>5.11 Other types of support provided<br>5.12 Other support requested or suggested by CHW<br>5.13 Sources of information for CHW<br>5.14 Technological Support                                                                                                                                                                                                                         |
| <b>6 Beyond the areas of support provided – or not provided - what other issues helped or hindered CHW experience in providing services during COVID-19 – including routine services and COVID-19-specific services?</b> | <b>System Level</b><br>6.1 Human resource<br>6.2 Financial resources<br>6.3 Essential medicines / routine vaccines<br>6.4 Information systems<br>6.5 Power Structures<br><b>Community Level</b><br>6.6 Community attitudes<br>6.7 Community ability to access services<br><b>Family/Personal level</b><br>6.8 Domestic responsibilities and family support<br>6.9 Financial circumstances<br><b>Wider issues beyond the health system</b><br>6.10 Movement restrictions<br>6.11 Transportation<br>6.12 Other enablers/barriers<br>6.13 Enablers and Barriers in providing services during Covid-19<br>6.14 Gendered hierarchies |
| <b>7 Wider system issues that affected support provided to CHW and their ability to conduct activities related to covid and to continue routine services</b>                                                             | 7.1 Previous epidemic experience<br>7.2 Support from development partners and level of coordination<br>7.3 Government coordination and decision-making systems<br>7.4 OTHER factors                                                                                                                                                                                                                                                                                                                                                                                                                                             |

| Theme                                                                   | Sub-theme                                                                        |
|-------------------------------------------------------------------------|----------------------------------------------------------------------------------|
| <b>8 Effectiveness of service delivery – COVID-19-specific services</b> | 8.1 Effective delivery of COVID-19-related services by CHW                       |
|                                                                         | 8.2 Effectiveness Covid-19 Services- patient/community views                     |
| <b>9 Effectiveness of service delivery – routine CHW services</b>       | 9.1 Delivery of routine services during COVID-19 - changes in coverage           |
|                                                                         | 9.2 Delivery of routine services during COVID-19 – changes in equitable coverage |
|                                                                         | 9.3 Delivery of routine services during COVID-19 - changes in quality            |
|                                                                         | 9.4 Cease providing essential healthcare services                                |
| <b>10 CHW well-being during COVID-19</b>                                | 10.1 Mental well-being of CHWs during COVID-19                                   |
|                                                                         | 10.2 Effects on CHW workload                                                     |
|                                                                         | 10.3 Other effects on CHW wellbeing                                              |
| <b>11 What adaptations enabled continued service delivery?</b>          | 11.1 Telemedicine                                                                |
|                                                                         | 11.2 Change in drug provision                                                    |
|                                                                         | 11.3 Change service location                                                     |
|                                                                         | 11.4 OTHER adaptations                                                           |
